# Supplementary material
Source: PubMed Central journal article supplement (PMC2978606)
Supplement: supp_M110.168039_jbc.M110.168039-1.pdf [file supp_M110.168039_jbc.M110.168039-1.pdf]

**SIRT6 DEFICIENCY RESULTS IN SEVERE HYPOGLYCEMIA BY ENHANCING  
BOTH BASAL AND INSULIN-STIMULATED GLUCOSE UPTAKE IN MICE**

**Cuiying Xiao<sup>1,4</sup>, Hyun-Seok Kim<sup>1,3,4</sup>, Tyler Lahusen<sup>1,4</sup>, Rui-Hong Wang<sup>1</sup>, Xiaoling Xu<sup>1</sup>,  
Oksana Gavrilova<sup>2</sup>, William Jou<sup>2</sup>, David Gius<sup>3</sup>, and Chu-Xia Deng<sup>1</sup>**

**Supplemental Figures**

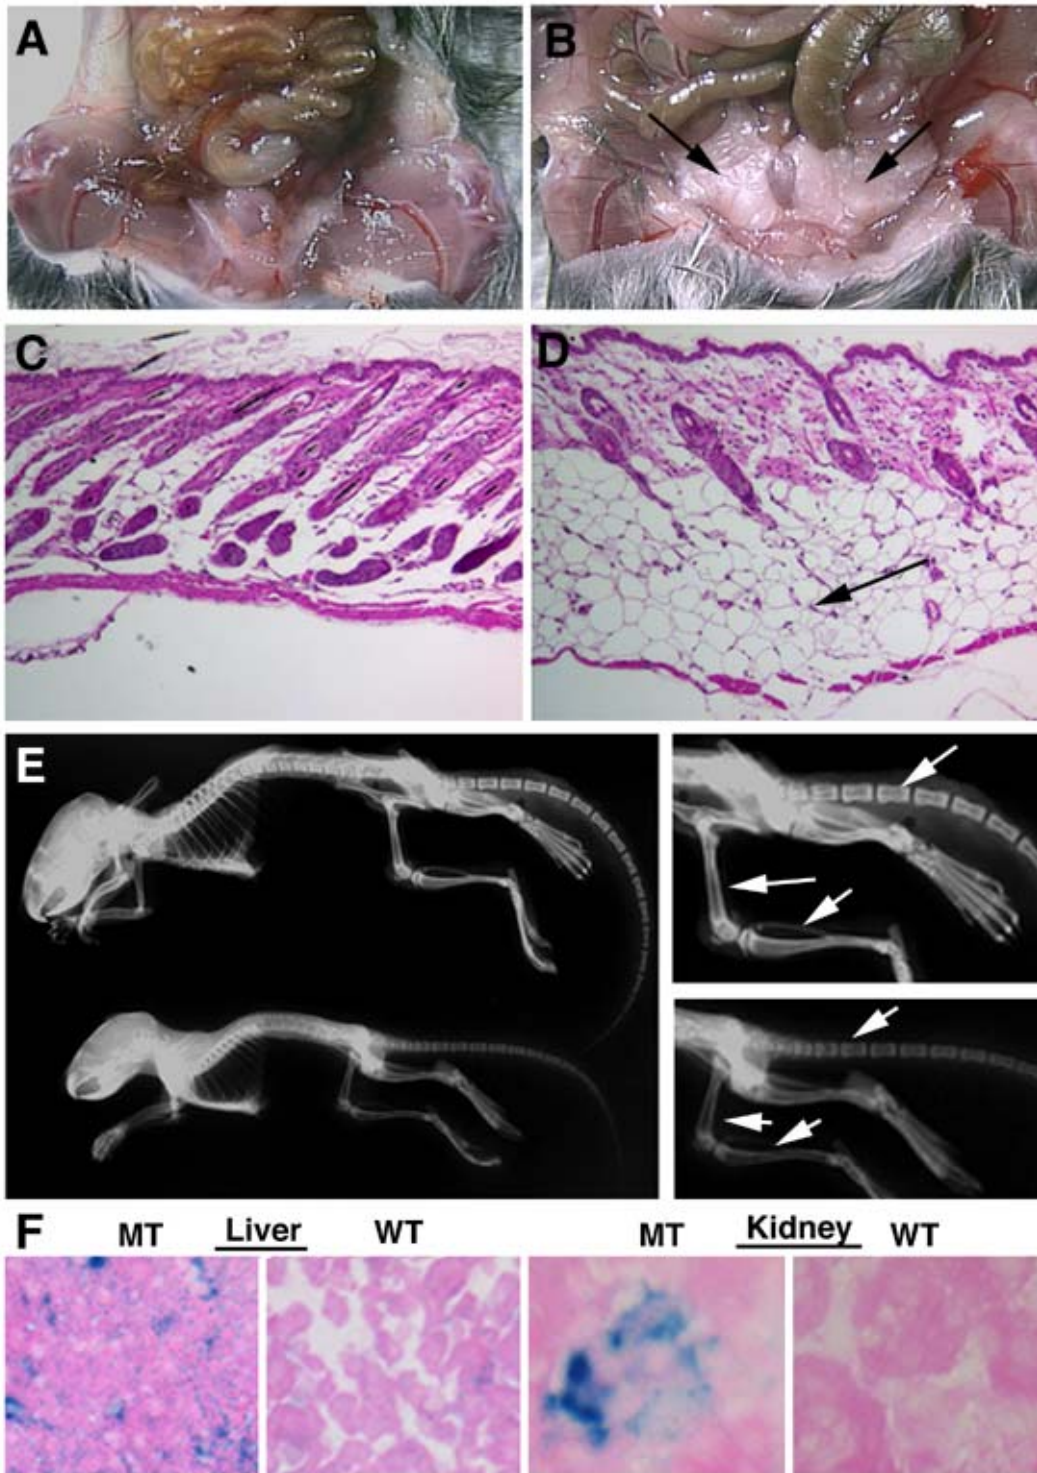

Supplemental FIGURE. 1. Phenotypic analysis of *Sirt6* <sup>$\Delta 2-3/\Delta 2-3$</sup>  mice. *A-B*. Visceral fat (arrows in *B*) was missing in the SIRT6 mutant mouse (*A*) at P25. *C-D*. H&E skin sections of SIRT6 mutant (*C*) and wild-type control (*D*) mice at P20. Arrow in (*D*) points to subcutaneous fat. *E*.

X-ray image of SIRT6 wild-type (upper) and mutant (lower) mice at P28. SIRT6 mutant mice have reduced bone density compared with control mice (arrows). *F*. SIRT6 mutant mice exhibit increased staining for acidic  $\beta$ -galactosidase revealed by senescence-associated  $\beta$ -gal staining in the liver and kidney at P15.

**A**

|             | Sirt6 <sup>+/+</sup> ;<br>p53 <sup>-/-</sup><br>(1/16) | Sirt6 <sup>+/+</sup> ;<br>p53 <sup>+/-</sup><br>(1/8) | Sirt6 $\Delta/\Delta$ ;<br>p53 <sup>+/-</sup><br>(1/8) | Sirt6 $\Delta/\Delta$ ;<br>p53 <sup>-/-</sup><br>(1/16) | Sirt6 $\Delta/\Delta$ ;<br>p53 <sup>+/+</sup><br>(1/16) | Sirt6 $\Delta/+$ ;<br>p53 <sup>-/-</sup><br>(1/8) | Sirt6 $\Delta/+$ ;<br>p53 <sup>+/-</sup><br>(1/4) | Sirt6 $\Delta/+$ ;<br>p53 <sup>+/+</sup><br>(1/8) | Sirt6 <sup>+/+</sup> ;<br>p53 <sup>+/+</sup><br>(1/16) | Total<br>number<br>of mice |
|-------------|--------------------------------------------------------|-------------------------------------------------------|--------------------------------------------------------|---------------------------------------------------------|---------------------------------------------------------|---------------------------------------------------|---------------------------------------------------|---------------------------------------------------|--------------------------------------------------------|----------------------------|
| No. of mice | 3                                                      | 19                                                    | 18*                                                    | 13*                                                     | 10*                                                     | 18                                                | 42                                                | 15                                                | 13                                                     | 164                        |

\* These mice were morphologically similar irrespective of their p53 status

**B**

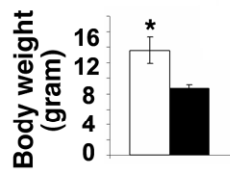

**C**

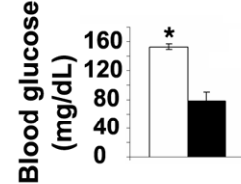

**D**

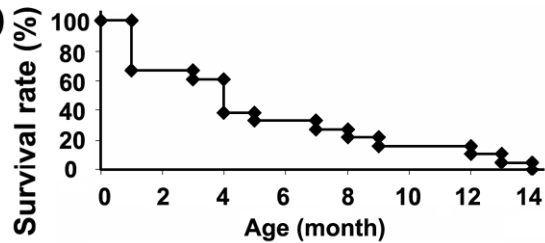

Supplemental FIGURE 2. Phenotype of *Sirt6* <sup>$\Delta 2-3/\Delta 2-3$</sup>  mice in p53 mutant background. A.

Offspring of interbred between *Sirt6* <sup>$\Delta 2-3/+$</sup> ;*p53* <sup>$+/-$</sup>  mice. *B-D*. Body weight (B) and blood glucose level (C), and viability (D) of *Sirt6* <sup>$\Delta 2-3/\Delta 2-3$</sup> ;*p53* <sup>$+/-$</sup>  and *Sirt6* <sup>$\Delta 2-3/\Delta 2-3$</sup> ;*p53* <sup>$-/-$</sup>  mice. Open bars in B and C are WT animals, black bars in B and C are mutants.

**A**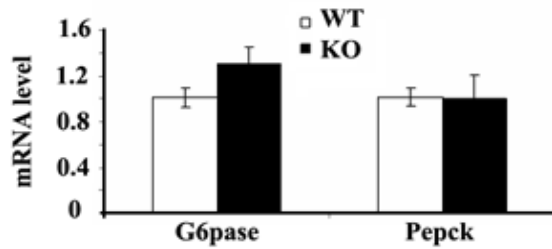**B**

|    | Food consumed (g/g BW/day) |        |        |
|----|----------------------------|--------|--------|
|    | P28-29                     | P32-39 | P40-46 |
| WT | 0.22                       | 0.19   | 0.20   |
| MT | 0.20                       | 0.18   | 0.20   |

Supplemental FIGURE 3. Gluconeogenic gene expression and food intake of Sirt6 mutant and control mice. *A*. G6pase and Pepck mRNA levels in the liver. *B*. Food intake of Sirt6 mutant and WT control mice after normalized with their body weight. No difference was observed. At least 4 pairs of animals at each time point were used.

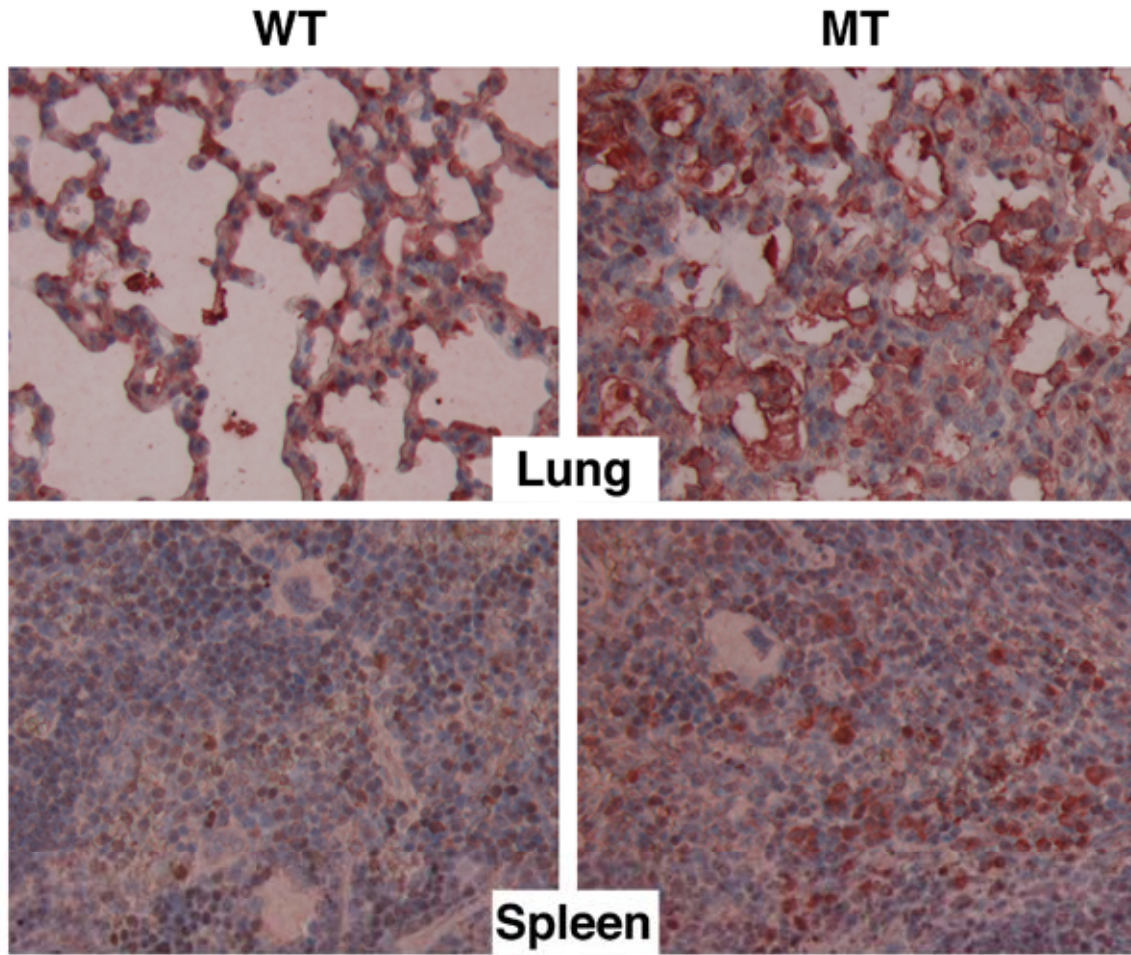

Supplemental FIGURE 4. Immunohistochemical staining of GLUT1 in lung and spleen of SIRT6 wild-type and mutant mice. Organs and genotypes were as indicated.
